# Supplementary material for: Molecular Cloning and Functional Characterization of Catalase in Stress Physiology, Innate Immunity, Testicular Development, Metamorphosis, and Cryopreserved Sperm of Pacific Abalone
Source: MDPI journal article supplement (doi:10.3390/antiox12010109), 2023-01-01
Supplement: s1 [file s1]

[*Supplementary file*]

**Molecular Cloning and Functional Characterization of Catalase in Stress Physiology, Innate Immunity, Testicular Development, Metamorphosis, and Cryopreserved Sperm of Pacific Abalone**

**Table S1.** List of primers used for cDNA cloning, tissue distribution, and expression analysis of *Hdh-CAT* in Pacific abalone.

| Primer name              | Nucleotide sequence (5'---3')                 | Purpose        |
|--------------------------|-----------------------------------------------|----------------|
| CAT-Fw                   | ATGGAGTGCCCTTTCAAGC                           | RT-PCR         |
| CAR-Rv                   | CTATGGCTCCACTTTCAAGG                          |                |
| Hdh-CAT-3' RACE          | GATTACGCCAAGCTTGTGCCCTTTCAAGCTCTCTGGAGACG     | RACE PCR       |
| Hdh-CAT-5' RACE          | GATTACGCCAAGCTTCTCTGTGCTGTATCTGGCGACGTCTC     |                |
| Universal primer (short) | CTAATACGACTCACTATAGGGC                        |                |
| Universal primer (long)  | CTAATACGACTCACTATAGGGCAAGCAGTGGTATCAACGCAGAGT |                |
| Hdh-CAT-Fw               | CTGAGAGAGTCGTACATGC                           | qRT-PCR        |
| Hdh-CAT-Rv               | CCTTCTCACCACCTACAGTT                          |                |
| $\beta$ -Actin-Fw        | CCGTGAAAAGATGACCCAGA                          |                |
| $\beta$ -Actin-Rv        | TACGACCGGAAGCGTACAGA                          |                |
| Hdh-CAT-Sense            | CATGGCGACCAGGGATAAG                           | FISH           |
| Hdh-CAT-Antisense        | CCTTGGTTTGTCTTGAAGTGA                         |                |
| Oligo dT (OdT)           | GGCCACGCGTCGACTAGTACTTTTTTTTTTTTTTTTTT        | cDNA synthesis |
| Oligo dT adapter (AP)    | GGCCACGCGTCGACTAGTAC                          |                |

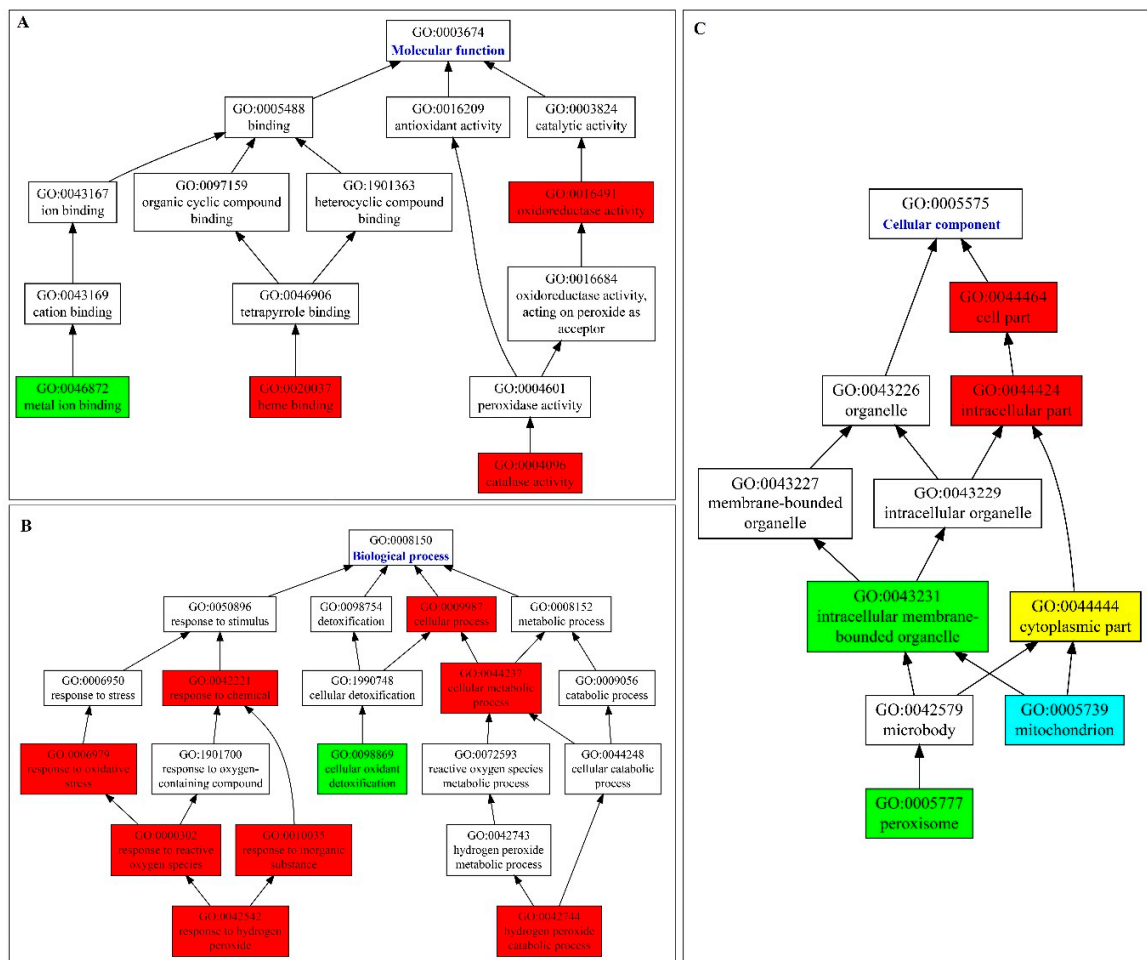

**Figure S1.** Functional activity analysis of Hdh-CAT amino acid sequence of Pacific abalone, *H. discus hannai*. (A) Molecular function, (B) Biological process, (C) Cellular component.

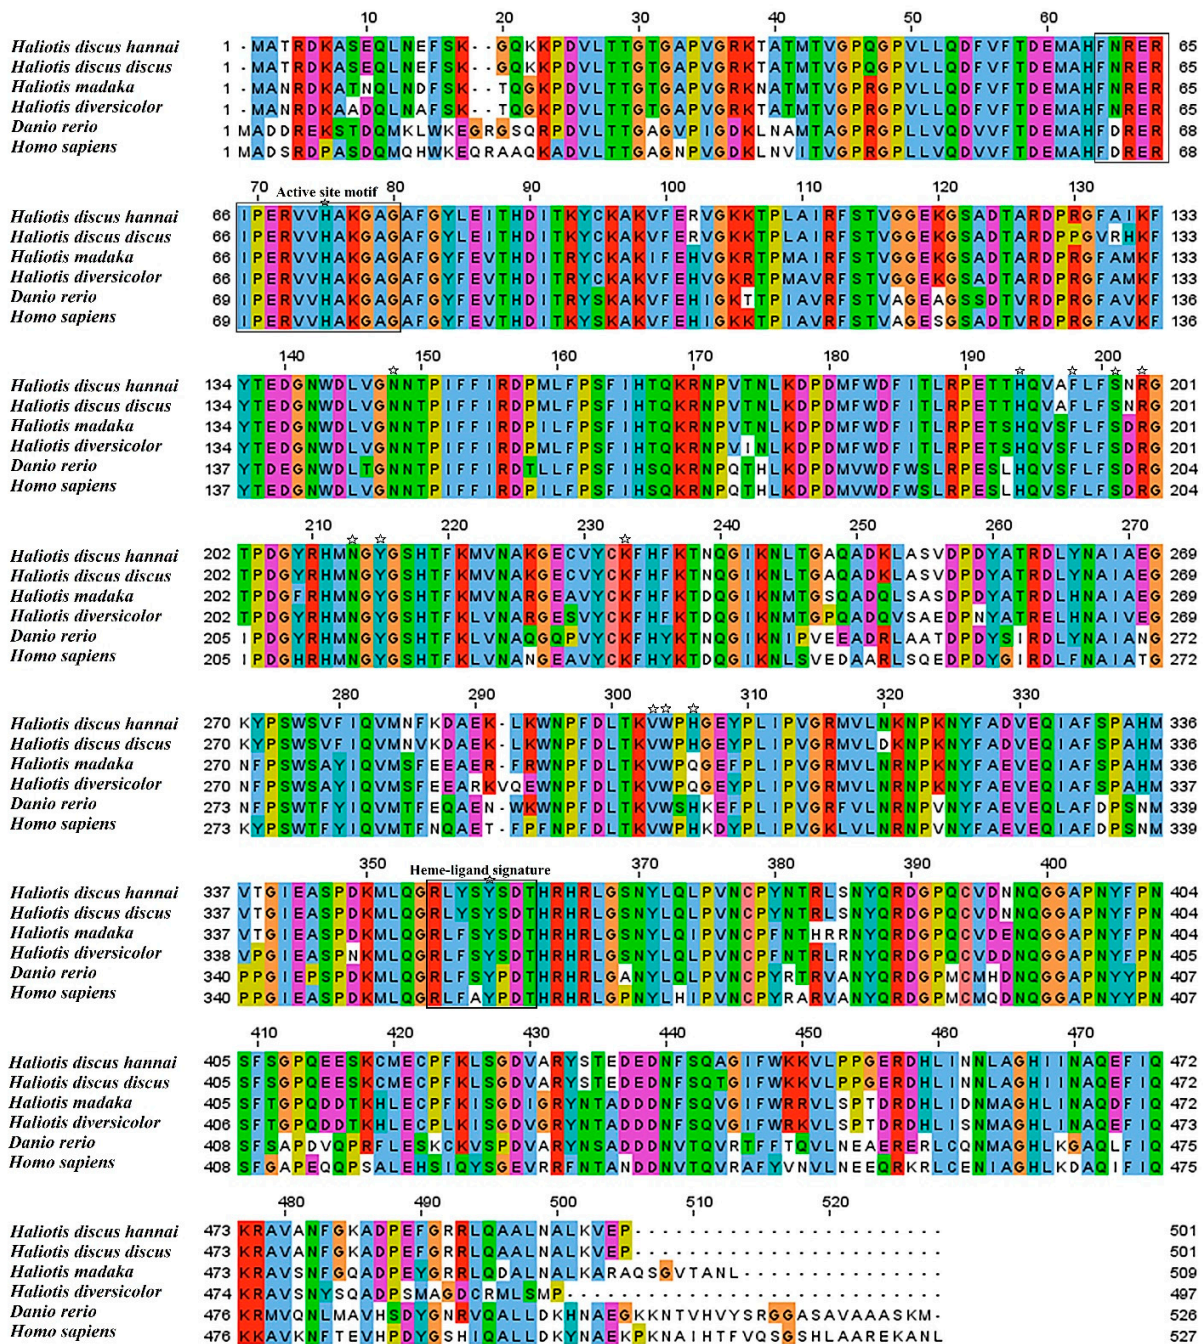

**Figure S2.** Multiple sequence alignment of deduced amino acid sequences of different catalase (CAT) from *H. discus hannai* (UFT26656.1), *H. discus discus* (ABQ60044.1), *H. madaka* (ALU63753.1), *H. diversicolor* (AEP83810.1), *Danio rerio* (NP\_570987.2), and *Homo sapiens* (NP\_001743.1). CAT active site motif and heme-ligand binding site motif are indicated by blacked lined box. Conserved NADPH binding site residues are pointed using a symbol on the top of each residue.

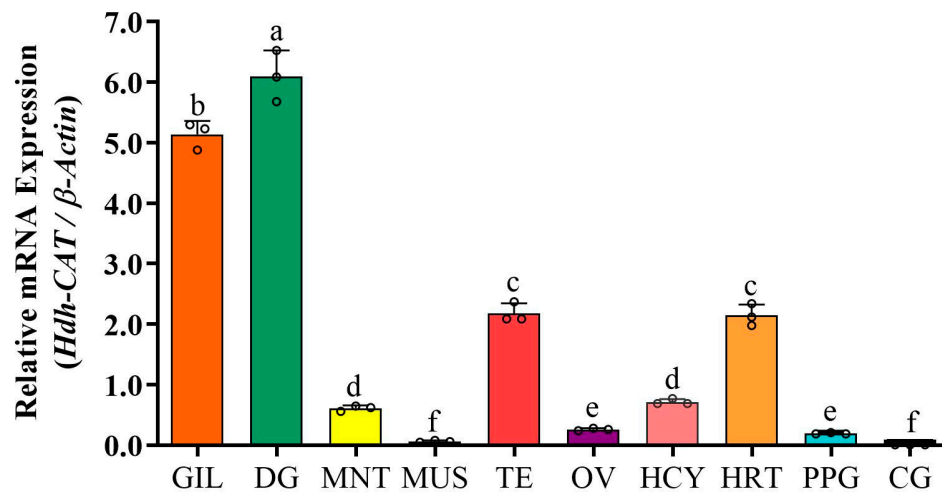

**Figure S3.** Expression of *Hdh-CAT* mRNA in different tissue of Pacific abalone, *Haliotis discus hannai*. GIL; gill, DG; digestive gland, MNT; mantle, MUS; muscle, TE; testis, OV; ovary, HCY; hemocyte, HRT; heart, PPG; pleuropedal ganglion, CG; cerebral ganglion. Different letters above the bar indicate significance difference ( $p < 0.05$ ).
